# Supplementary material for: Proteomics analysis of extracellular matrix remodeling during zebrafish heart regeneration
Source: bioRxiv or medRxiv preprint supplement (doi:10.1101/588251), 2019-03-25
Supplement: Supplementary file [file media-1.pdf]

## Supplementary Information

### Proteomics analysis of extracellular matrix remodeling during zebrafish heart regeneration

Anna Garcia-Puig<sup>1,2</sup>, Jose Luis Mosquera<sup>3</sup>, Senda Jiménez-Delgado<sup>1</sup>, Cristina García-Pastor<sup>1</sup>, Ignasi Jorba<sup>4,5,6</sup>, Daniel Navajas<sup>4,5,6</sup>, Francesc Canals<sup>7</sup>, and Angel Raya<sup>1,2,8,\*</sup>

<sup>1</sup> Center of Regenerative Medicine in Barcelona (CMRB), 3<sup>rd</sup> Floor Hospital Duran i Reynals, Avinguda de la Gran Via 199-203, 08908 Hospitalet de Llobregat (Barcelona), Spain.

<sup>2</sup> Center for Networked Biomedical Research on Bioengineering, Biomaterials and Nanomedicine (CIBER-BBN).

<sup>3</sup> Bioinformatics Unit, Institut d'Investigació Biomèdica de Bellvitge IDIBELL), 3<sup>rd</sup> Floor Hospital Duran i Reynals, Avinguda de la Gran Via 199-203, 08908 Hospitalet de Llobregat (Barcelona), Spain.

<sup>4</sup> Institute for Bioengineering of Catalonia (IBEC), Barcelona Science Park, Baldori Reixac 15-21, 08028 Barcelona, Spain.

<sup>5</sup> Unit of Biophysics and Bioengineering, Department of Physiological Sciences I, School of Medicine, University of Barcelona.

<sup>6</sup> Center for Networked Biomedical Research on Respiratory Diseases (CIBERES).

<sup>7</sup> Proteomics group, Vall d'Hebron Institut of Oncology (VHIO), Cellex center, Natzaret 115-117, 08035 Barcelona, Spain.

<sup>8</sup> Institució Catalana de Recerca i Estudis Avançats (ICREA).

\*Address for correspondence: Angel Raya, Phone: +34 933 160 320; Fax: +34 933 160 332; Email: [araya@cmrb.eu](mailto:araya@cmrb.eu)

**Running title:** Regenerating heart ECM proteome

**Keywords:** extracellular matrix; heart regeneration; proteomic analysis; atomic force microscopy.

## Supplementary Information contains:

7 Supplementary Tables as individual sheets in attached Excel file:

**Supplementary Table 1. Proteins identified during the decellularization process.** Native zebrafish hearts, after SDS treatment (half), and at the end of decellularization (fully), were analyzed by LC-MS. Log2 raw intensities and VSN normalized intensities are given for each replicate of each sample group.

**Supplementary Table 2. Peptides identified in the decellularized samples.** Table of all the entries identified in our samples. The table contains the protein name, accession number, molecular weight and the spectral counts values obtained per each replicate.

**Supplementary Table 3. List of proteins represented with an overall of >5 spectral counts.** The table contains for each protein the gene name, the accession number, the molecular weight (MW), the ANOVA value (F), the p-value, and the adjusted p-value (FDR), the values obtained per each replicate and the average. The ECM proteins are identified with an asterisk.

**Supplementary Table 4. List of proteins represented with an overall of >5 spectral counts, normalized by VSN method.** The table contains for each protein the gene name, the accession number, the molecular weight (MW), the ANOVA value (F), the p-value, and the adjusted p-value (FDR), the values obtained per each replicate and the average. The ECM proteins are identified with an asterisk.

**Supplementary Table 5. List of proteins differentially expressed during heart regeneration.** The table contains for each protein the gene name, the accession number, the molecular weight (MW), the ANOVA value (F), the p-value, and the adjusted p-value (FDR), the values obtained per each replicate and the average. The ECM proteins are identified with an asterisk. p-value obtained from an ANOVA test of all the samples.

**Supplementary Table 6. List of the peptide identification in LC-MS analysis.**

**Supplementary Table 7. List of protein identifications.**

1 Supplementary Figure

**Supplementary Figure 1. Biological Process GO enrichment analysis on the differentially expressed proteins during cardiac regeneration.** Comparison of the enriched Biological Process GO terms on our differentially expressed proteins (A) and the 209 differential protein groups of Ma D. et al. (B).

**A**

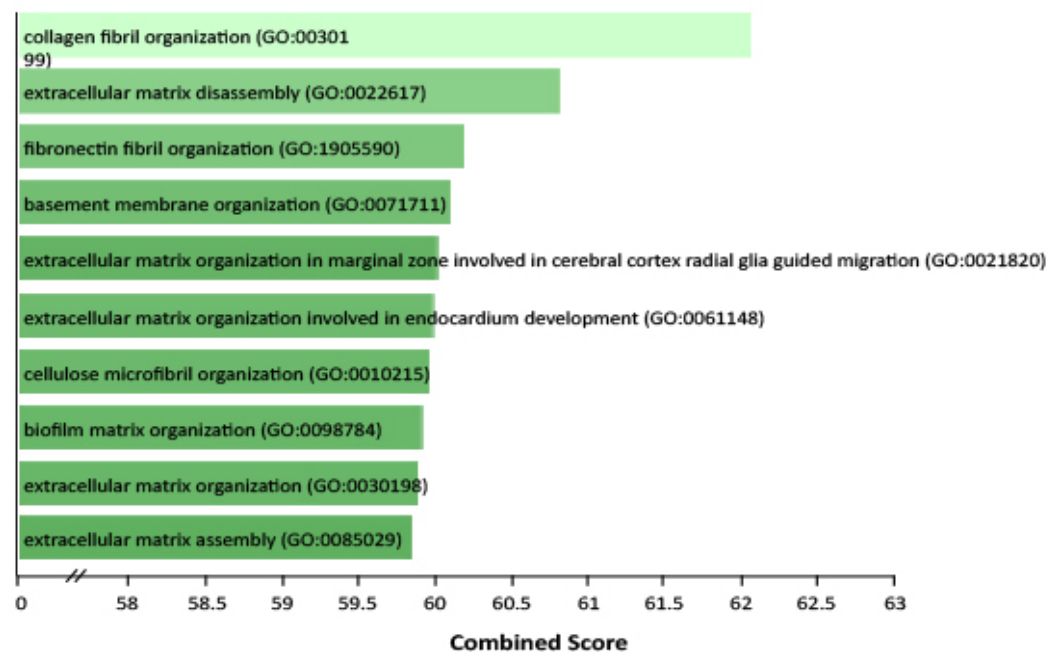

**B**

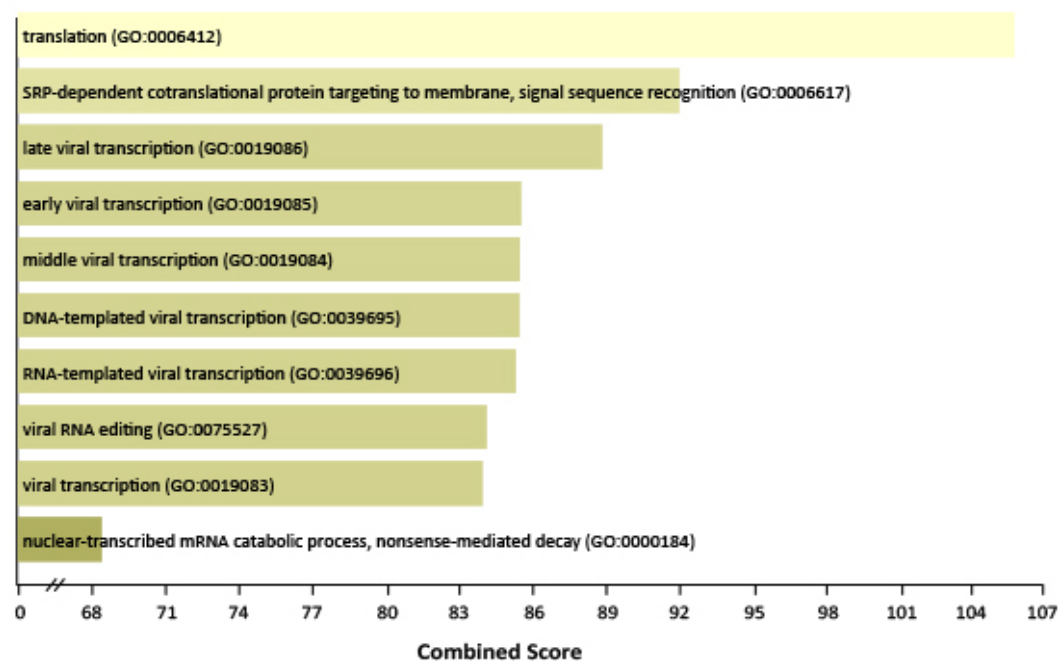

**Supplementary Fig. 1. Biological Process GO enrichment analysis on the differentially-expressed proteins during cardiac regeneration** Comparison of the enriched Biological Process GO terms on our differentially expressed proteins (A) and the 209 differential protein groups of Ma et al.<sup>53</sup> (B).
